# Supplementary material for: Epistasis and Pleiotropy Affect the Modularity of the Genotype–Phenotype Map of Cross-Resistance in HIV-1
Source: PubMed Central journal article supplement — Mol Biol Evol. 2016 Sep 27;33(12):3213–25. doi: 10.1093/molbev/msw206 (PMC5100054; doi:10.1093/molbev/msw206), 2016-09-27
Supplement: supp_msw206_SupplementaryInformation.pdf [file supp_msw206_SupplementaryInformation.pdf]

# Supplementary Information

to

## Epistasis and pleiotropy affect the modularity of the genotype-phenotype map of cross-resistance in HIV-1

by

Robert Polster, Christos J. Petropoulos, Sebastian Bonhoeffer, and Frédéric Guillaume

### Pleiotropy and epistatic pleiotropy

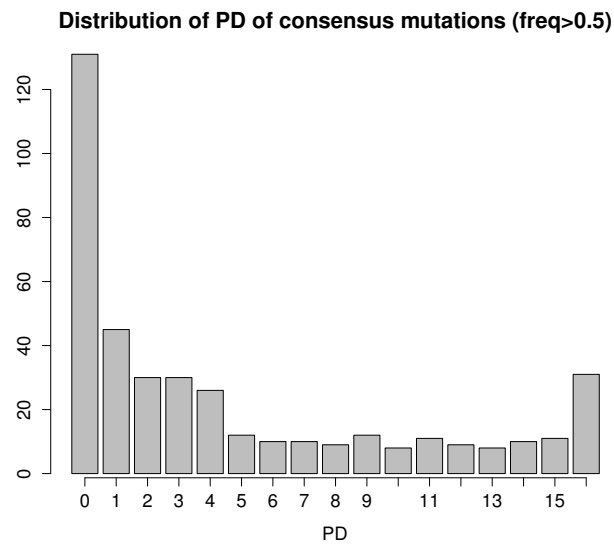

**Figure 1:** Distribution of PD of the 403 most frequent mutations with frequency  $> 0.5$ . They correspond to the amino acid consensus sequence of protease and reverse transcriptase.

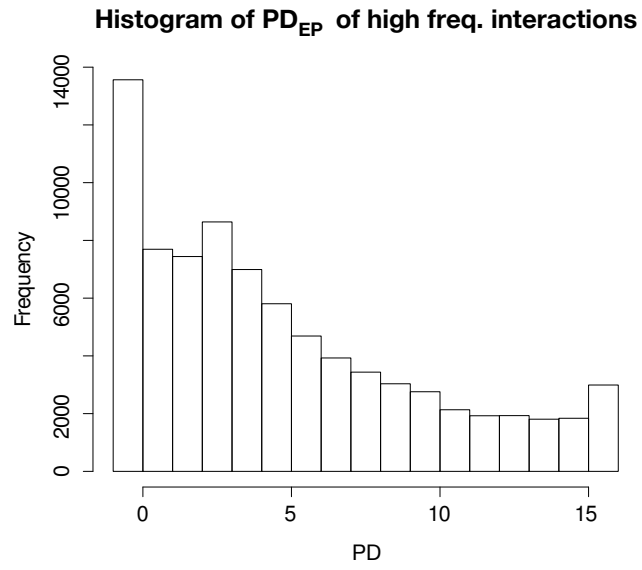

**Figure 2:** Distribution of pleiotropy among high-frequency mutation interactions (frequency > 0.5)

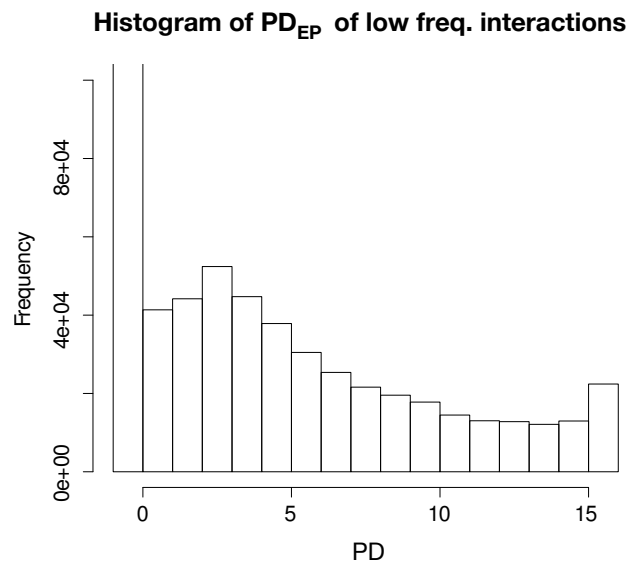

**Figure 3:** Distribution of pleiotropy among low-frequency mutation interactions (frequency < 0.5).

### effect of sig. filtering on magnitude of mut. effects

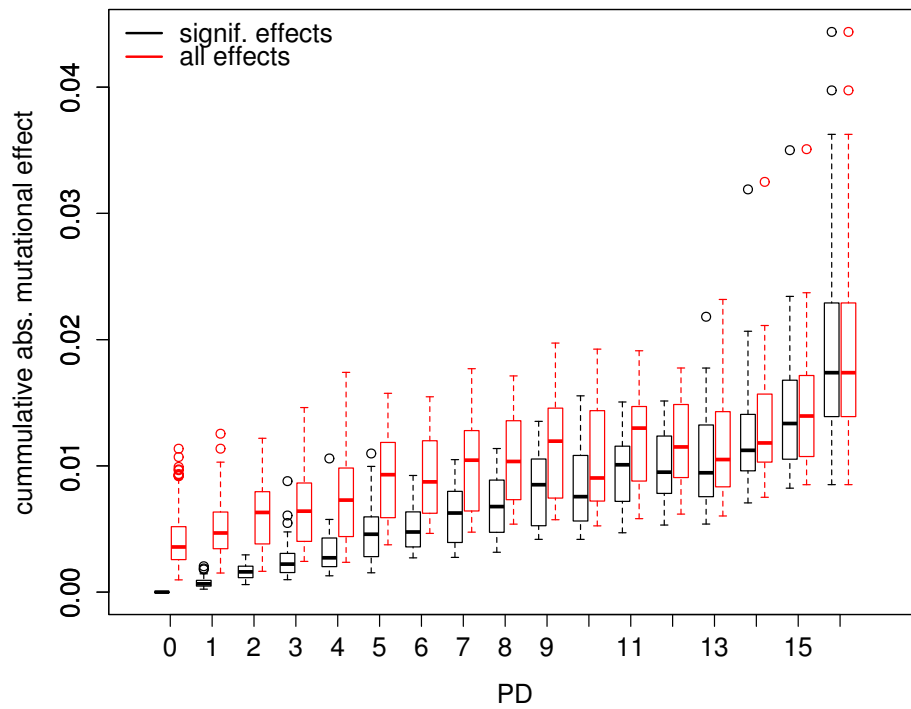

**Figure 4:** Distributions of the sum of absolute mutational effect sizes in all environments, counting only significant effects (black), or all 16 measured effects (red), for each PD class.

## PCA stability

The stability of the three first principal components of the PCA on the ME, MEEP, and SEQ **G**-matrices is tested by downsampling the sequence space and by bootstrapping it. In each case, 10,000 replicates were performed. We used the vector correlation between the original PCs and the replicate PCs as our statistics, reported below as the average absolute value of the 10,000 replicates. The sample sizes used for downsampling are reported in the first column. Sampling is without replacement. Bootstrapping is performed by sampling with replacement within the whole sequence space.

Table 1

| sample size | ME     |        |        | MEEP   |        |        | SEQ    |        |        |
|-------------|--------|--------|--------|--------|--------|--------|--------|--------|--------|
|             | PC1    | PC2    | PC3    | PC1    | PC2    | PC3    | PC1    | PC2    | PC3    |
| 10          | 0.9968 | 0.9024 | 0.5234 | 0.8791 | 0.6377 | 0.4760 | 0.9137 | 0.6381 | 0.4382 |
| 100         | 0.9998 | 0.9939 | 0.7512 | 0.9924 | 0.9638 | 0.8061 | 0.9944 | 0.9189 | 0.7678 |
| 1000        | 0.9999 | 0.9994 | 0.9373 | 0.9993 | 0.9967 | 0.9788 | 0.9994 | 0.9923 | 0.9783 |
| 5000        | 0.9999 | 0.9998 | 0.9913 | 0.9999 | 0.9994 | 0.9962 | 0.9999 | 0.9985 | 0.9963 |
| 10000       | 0.9999 | 0.9999 | 0.9960 | 0.9999 | 0.9997 | 0.9983 | 0.9999 | 0.9993 | 0.9983 |
| 25000       | 0.9999 | 0.9999 | 0.9988 | 0.9999 | 0.9999 | 0.9995 | 0.9999 | 0.9998 | 0.9995 |
| bootstrap   | 0.9999 | 0.9999 | 0.9994 | 0.9999 | 0.9999 | 0.9997 | 0.9999 | 0.9998 | 0.9997 |
| C.I. 2.5%   | 0.9999 | 0.9999 | 0.9969 | 0.9999 | 0.9998 | 0.9988 | 0.9999 | 0.9996 | 0.9991 |
| C.I. 97.5%  | 1.0000 | 0.9999 | 0.9999 | 0.9999 | 0.9999 | 0.9999 | 0.9999 | 0.9999 | 0.9999 |

## Hierarchical clustering of viral fitness among drugs

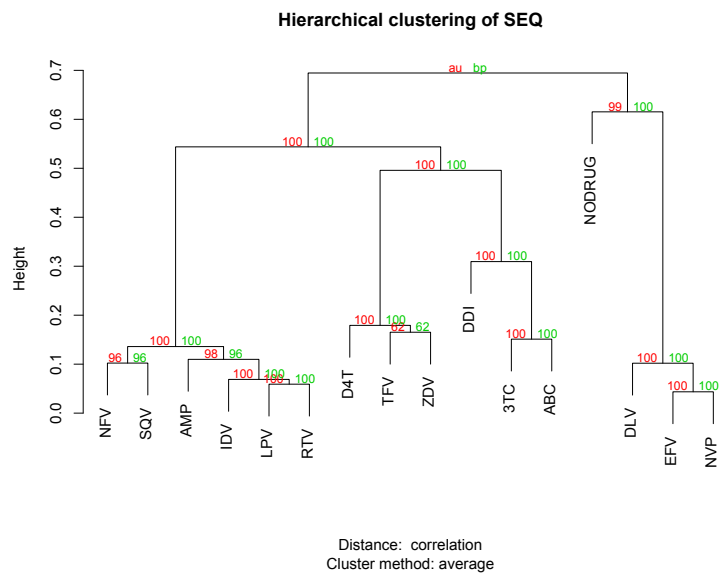

**Figure 5:** Hierarchical clustering of HIV-1 sequence fitness from the raw data (SEQ matrix). Bootstrap significance support is indicated for approximately unbiased  $p$ -values (au, red) and bootstrap probability  $p$ -values (bp, green) obtained from the `pvc1ust` package in R.

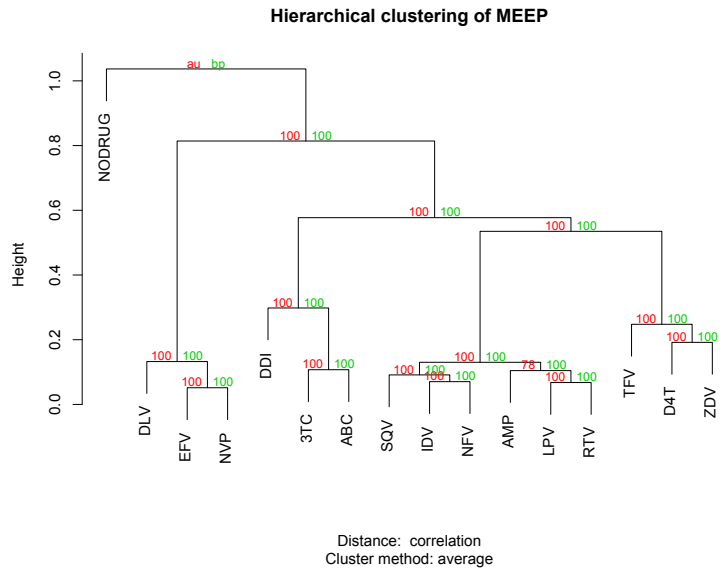

**Figure 6:** Hierarchical clustering of HIV-1 sequence fitness reconstructed from the MEEP model.

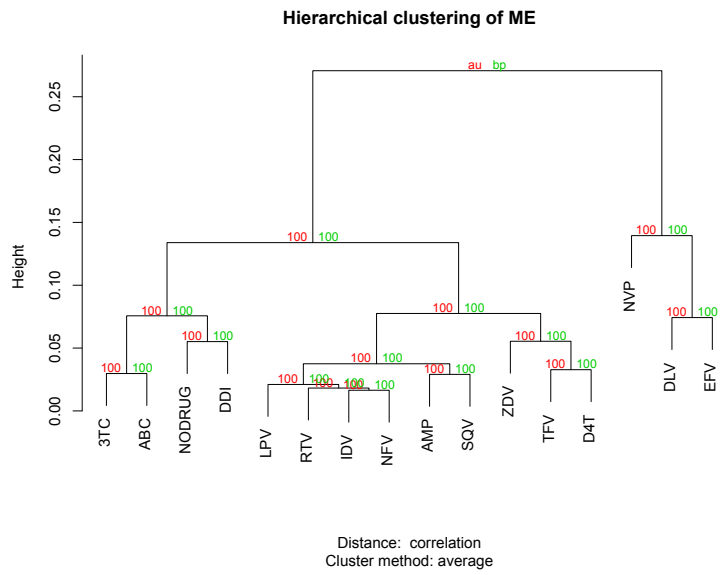

**Figure 7:** Hierarchical clustering of HIV-1 sequence fitness reconstructed from the main effects of the MEEP model.
